# Supplementary material for: Two New Three-Dimensional Pillared-Layer Co(II) and Cu(II) Frameworks Involving a [M2(EO-N3)2] Motif from a Semi-Flexible N-Donor Ligand, 5,5′-Bipyrimidin: Syntheses, Structures and Magnetic Properties
Source: MDPI journal article supplement (doi:10.3390/polym10030229), 2018-02-26
Supplement: s1 [file s1]

**(a)**

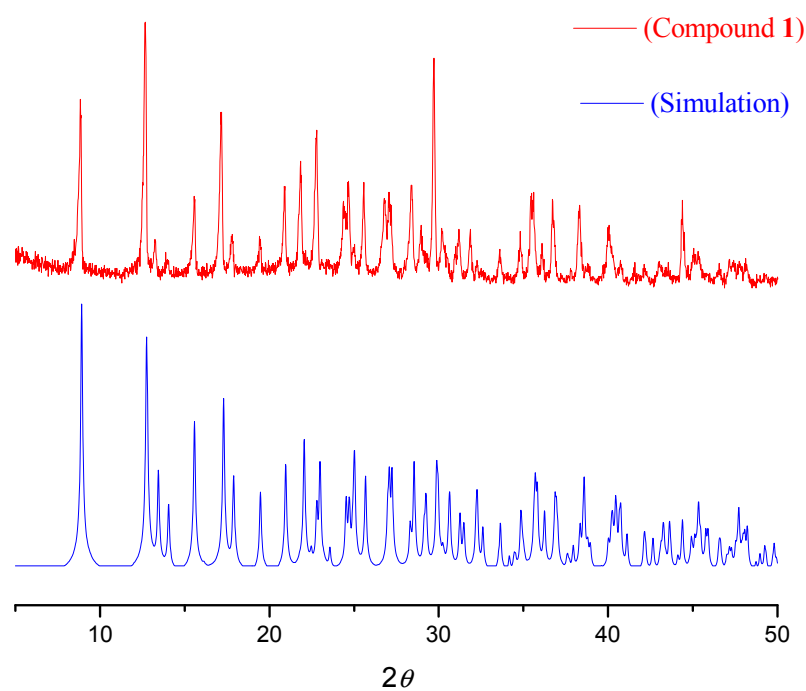

**(b)**

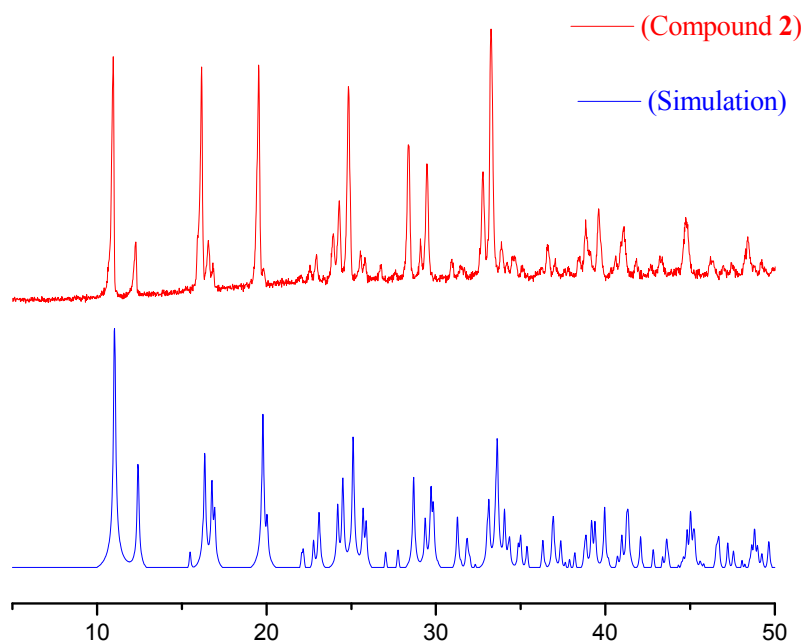

**Figure S1.** Simulated PXRD pattern (blue) and experimental PXRD pattern (red) of compounds **(a) 1** and **(b) 2**.



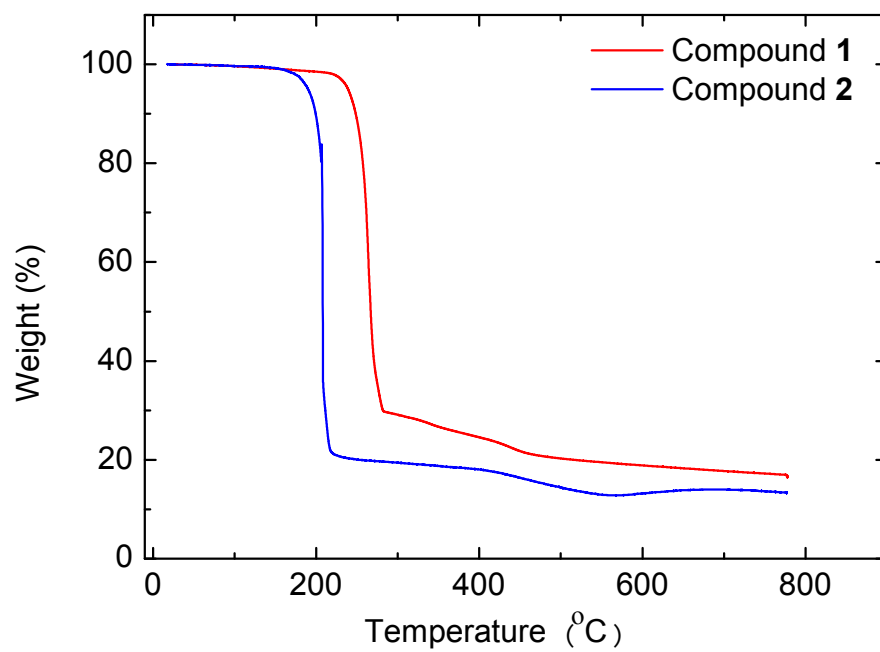

**Figure S2.** Thermogravimetric (TG) analysis diagrams of compounds **1** (red line) and **2** (blue line).



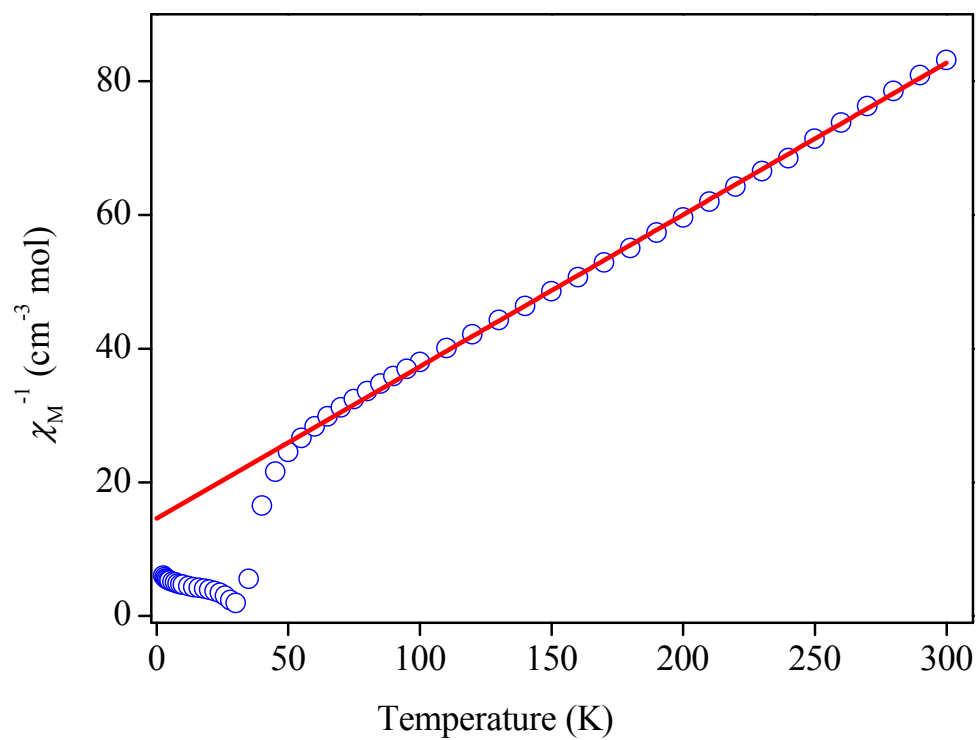

**Figure S3.** Plot of  $\chi_M^{-1}$  ( $\circ$ ) vs.  $T$  of compound **1**. The solid line represents the best fit  $\chi_M^{-1}$  above 100 K with a Curie–Weiss law.



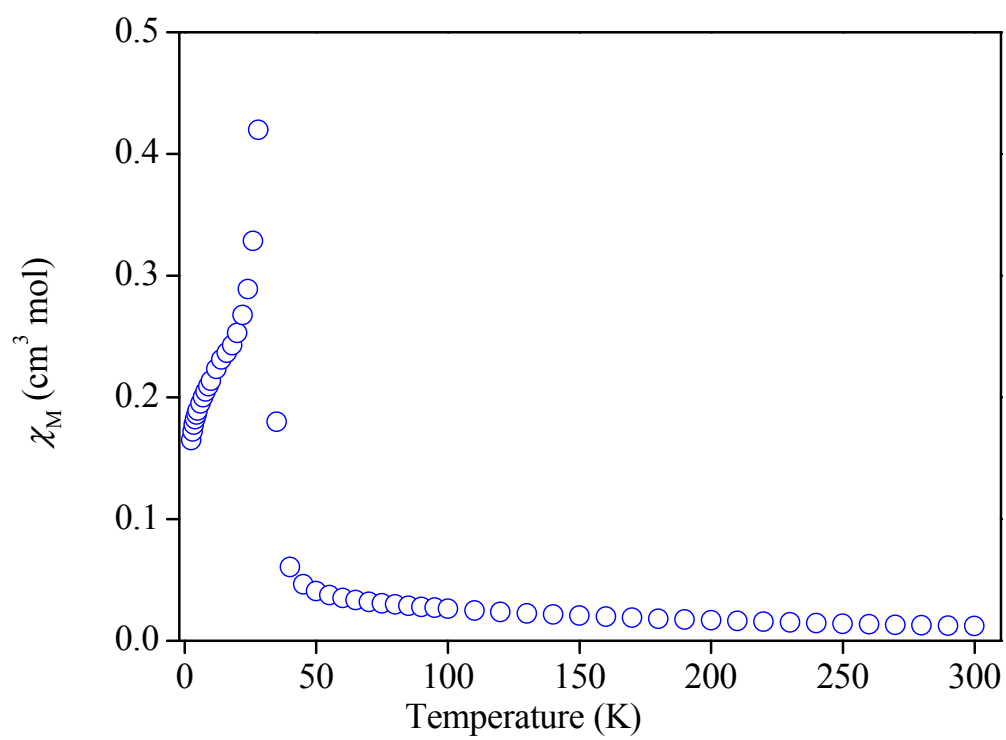

**Figure S4.** Plot of  $\chi_M$  ( $\circ$ ) vs.  $T$  of compound **1**.



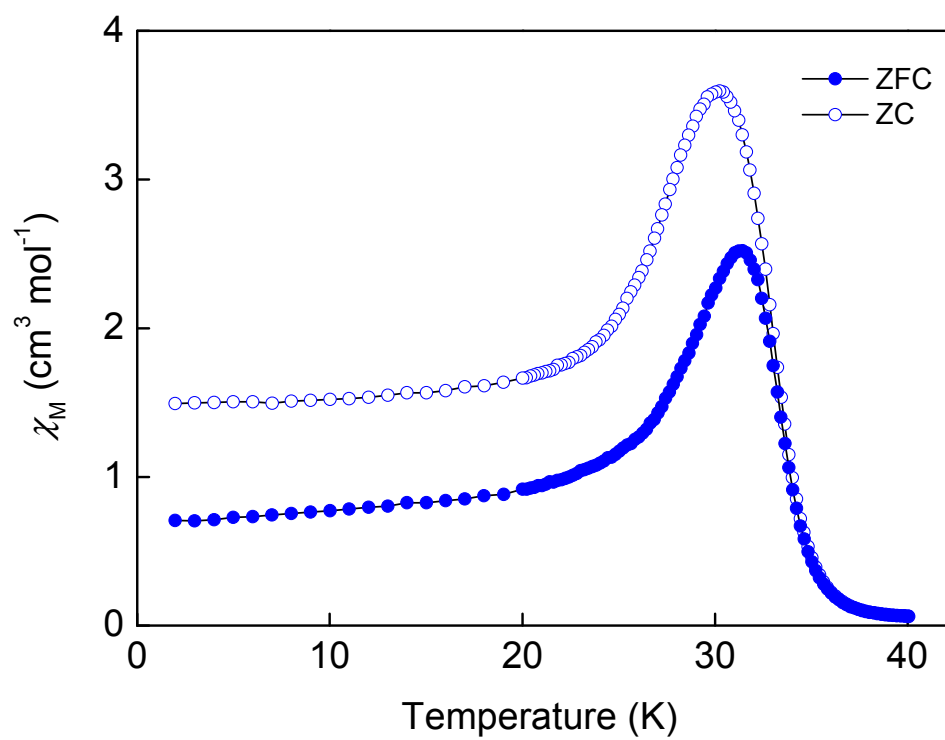

**Figure S5.** ZFC/FC magnetizations of compound **1** at the field of 20 Oe.



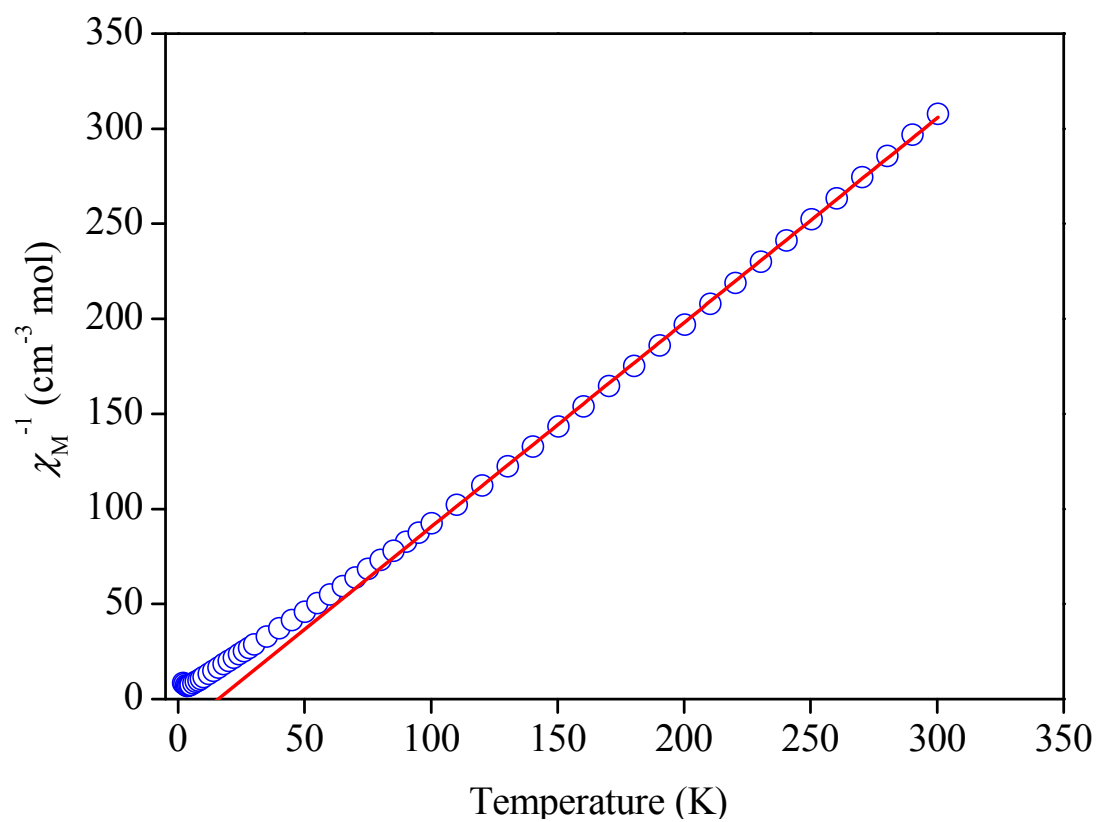

**Figure S6.** Plot of  $\chi_M^{-1}$  ( $\circ$ ) vs.  $T$  of compound **2**. The solid line represents the best fit  $\chi_M^{-1}$  above 90 K with a Curie–Weiss law.



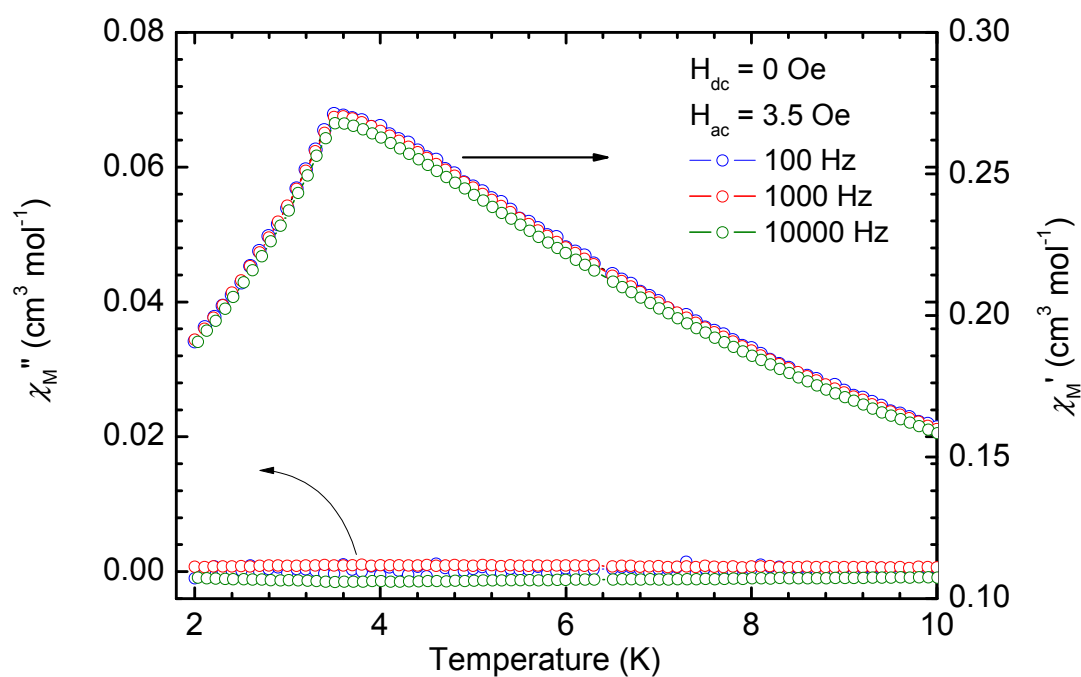

**Figure S7.** In phase ( $\chi'$ ) and out-of phase ( $\chi''$ ) of the ac magnetic susceptibilities in a zero applied dc field and a 3.5 G ac field at the indicated frequencies for compound **2**.



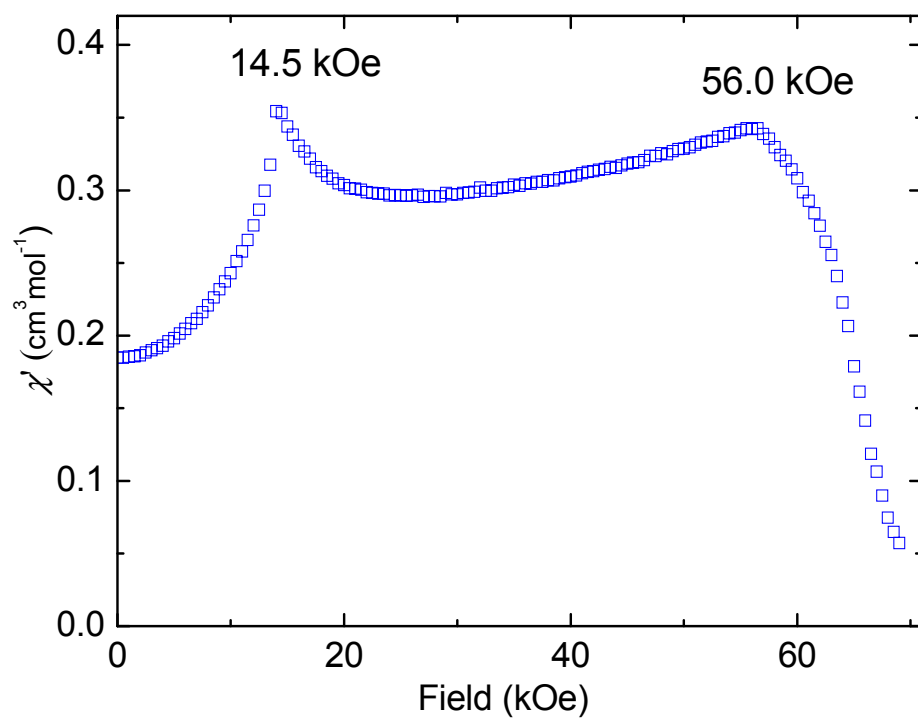

**Figure S8.**  $\chi_M'$  vs.  $H$  plots for field dependence of the ac magnetic susceptibilities in a zero applied dc field and in a 3.5 Oe ac field and 100 Hz at 2.0 K for **2**.



**(a)**

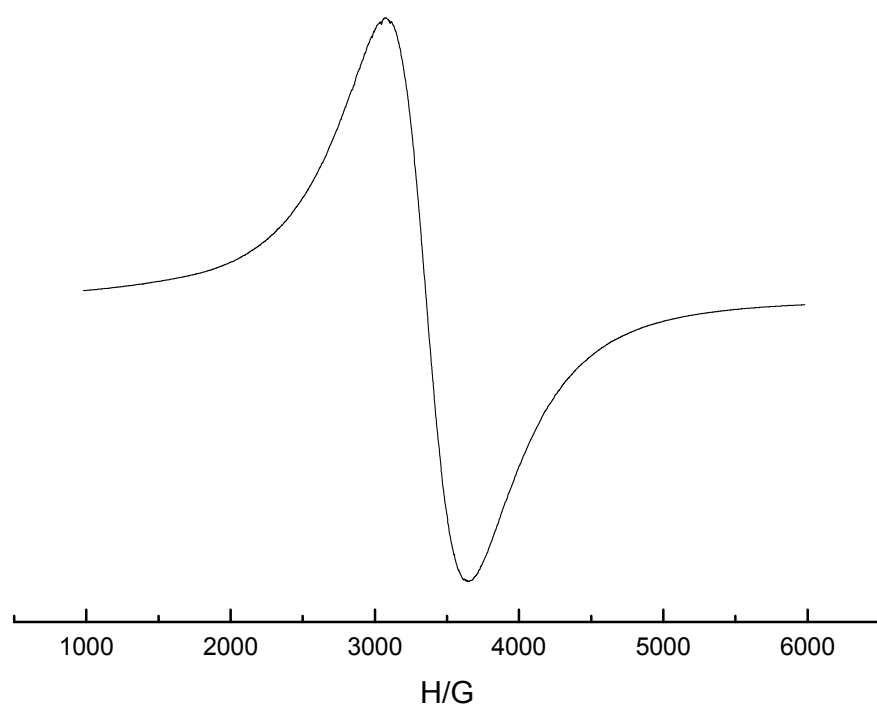

**(b)**

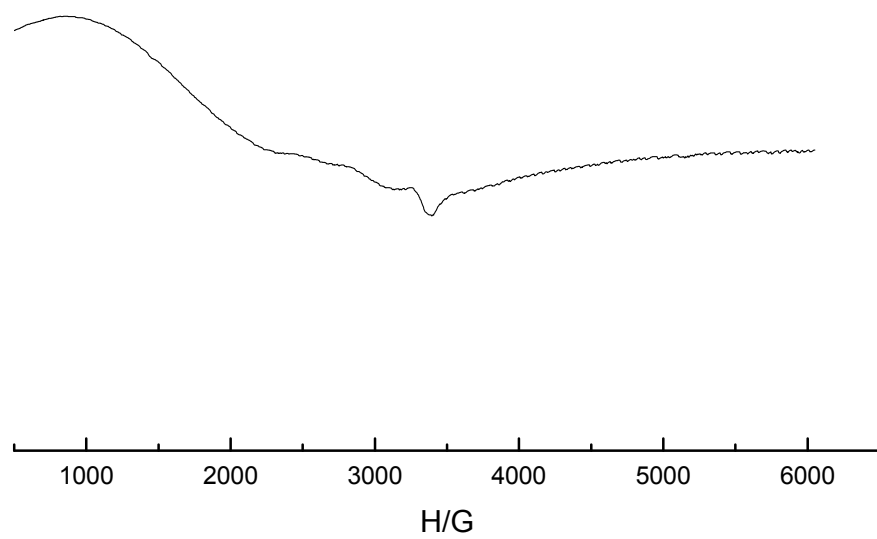

**Figure S9.** EPR spectra of **(a)** compound **1** and **(b)** compound **2**.
